# Supplementary material for: Genetic architecture of the white matter connectome of the human brain
Source: PubMed Central journal article supplement (PMC9937579; doi:10.1126/sciadv.add2870), 2023-02-17
Supplement: sciadv.add2870_sm.pdf [file sciadv.add2870_sm.pdf]

Supplementary Materials for  
**Genetic architecture of the white matter connectome of the human brain**

Zhiqiang Sha *et al.*

Corresponding author: Clyde Francks, [clyde.francks@mpi.nl](mailto:clyde.francks@mpi.nl)

*Sci. Adv.* **9**, eadd2870 (2023)  
DOI: 10.1126/sciadv.add2870

**The PDF file includes:**

Figs. S1 to S14  
Legends for tables S1 to S31

**Other Supplementary Material for this manuscript includes the following:**

Tables S1 to S31

### Spatial distribution of node-level connectivity

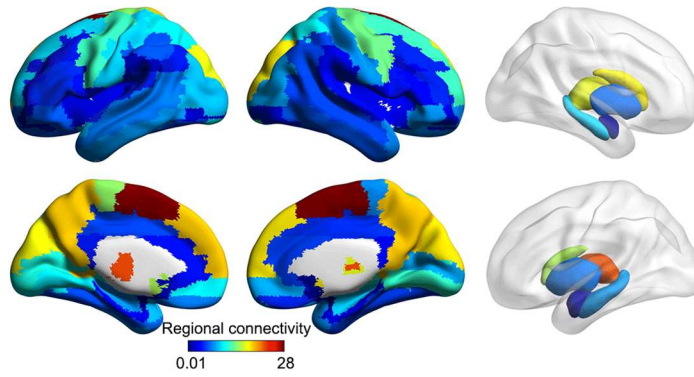

**Supplementary Figure 1. Spatial distribution of node-level connectivity.** The connectivity of each region of the AAL brain atlas was calculated as the sum of its white matter connections to all other regions (see Methods). Regions in orange-red colours had the highest connectivity.

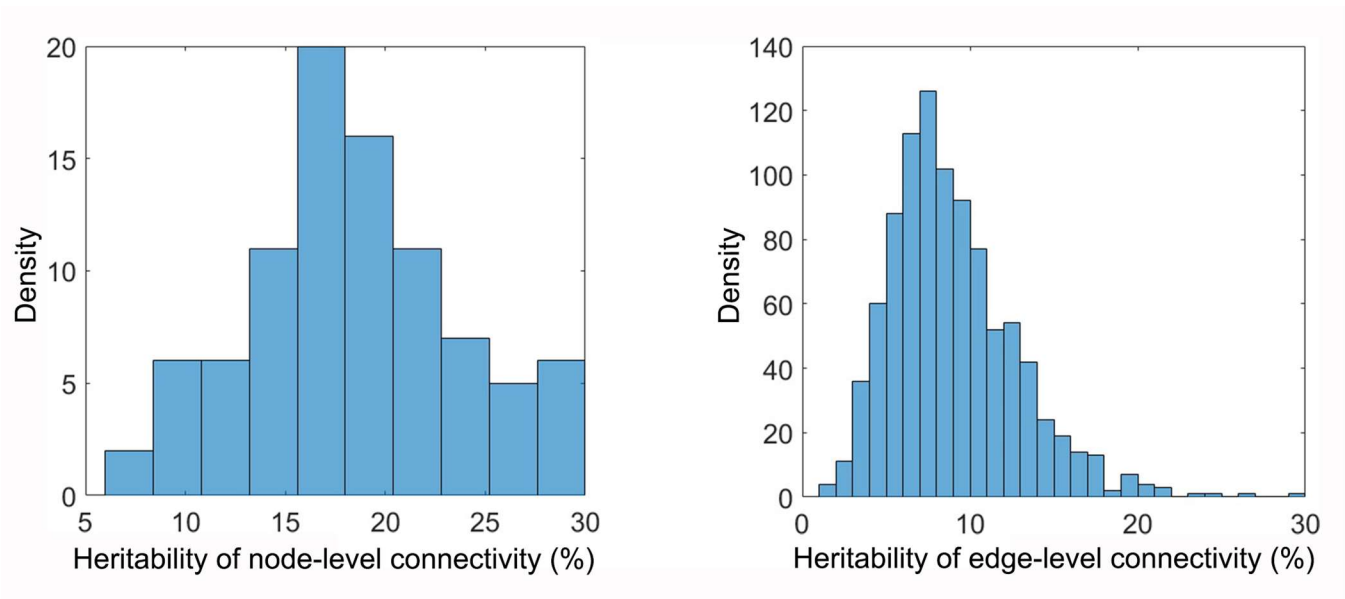

**Supplementary Figure 2. Frequency histograms showing the distributions of SNP-based heritabilities, separately for 90 node-level connectivities (Left panel) and 947 edge-level connectivities (Right panel).**

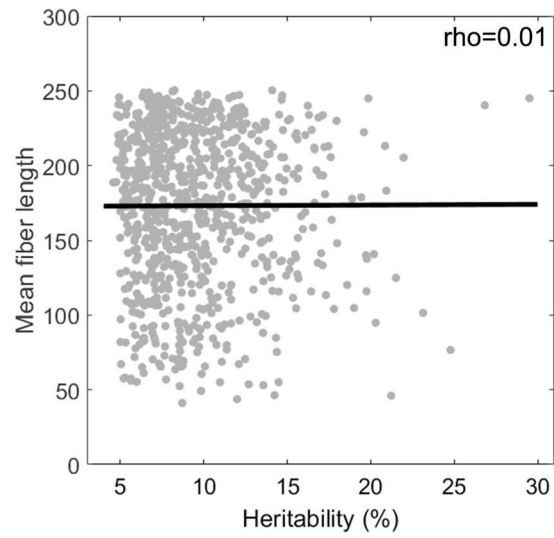

**Supplementary Figure 3. No significant correlation between SNP-based heritabilities and fiber lengths of edge-level connectivities.** Each dot represents an edge linking two brain regions defined in the AAL atlas.

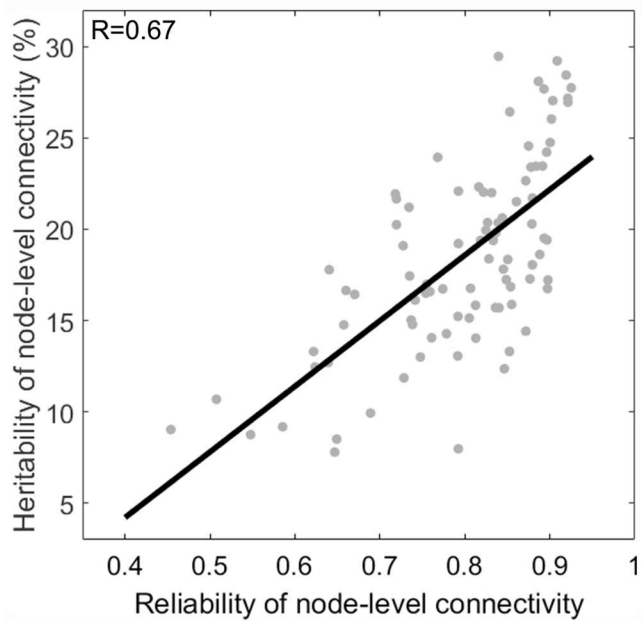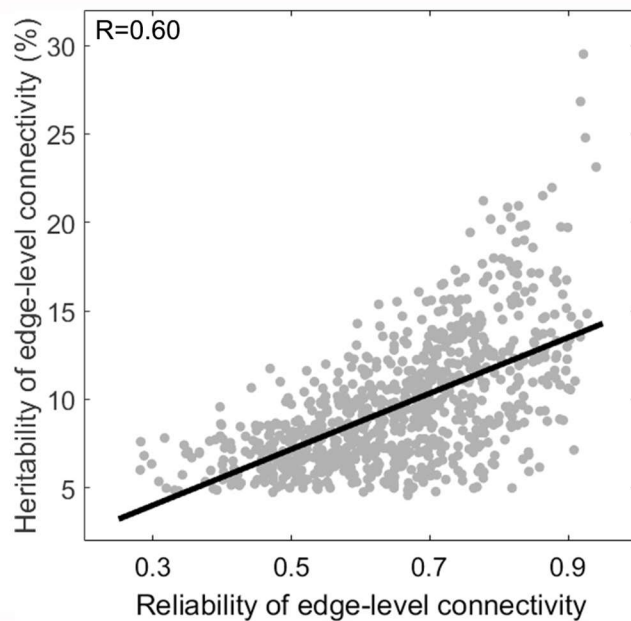

**Supplementary Figure 4. Correlations between reliability (intra-class correlation) and heritability, separately for 90 node-level connectivities (left) and 947 edge-level connectivities (right).**

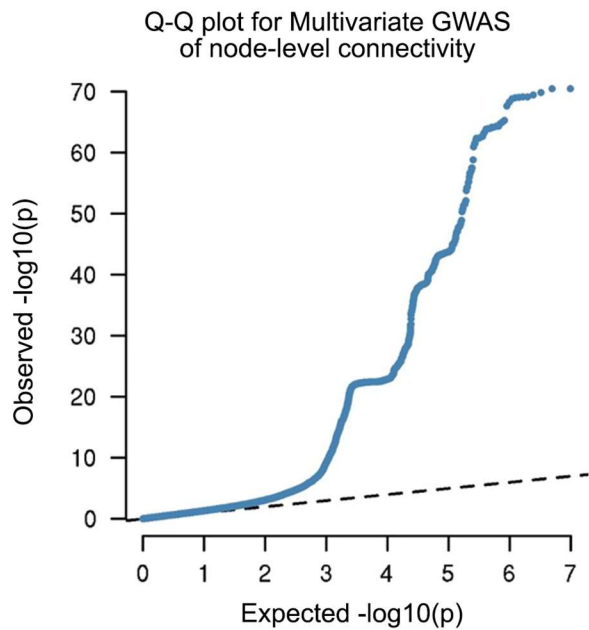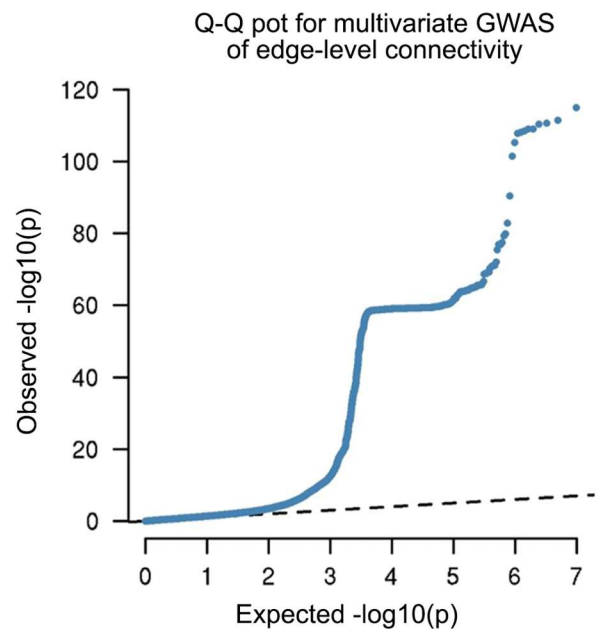

**Supplementary Figure 5. Q-Q plots of multivariate GWAS for node-level connectivity and edge-level connectivity**

Left panel: Q-Q plot of multivariate GWAS for node-level connectivity. Right panel: Q-Q plot of multivariate GWAS for edge-level connectivity. The black dotted line presents the observed  $-\log_{10}(p)$ -values from the multivariate GWAS plotted against the expected  $-\log_{10}(p)$ -values from a null distribution.

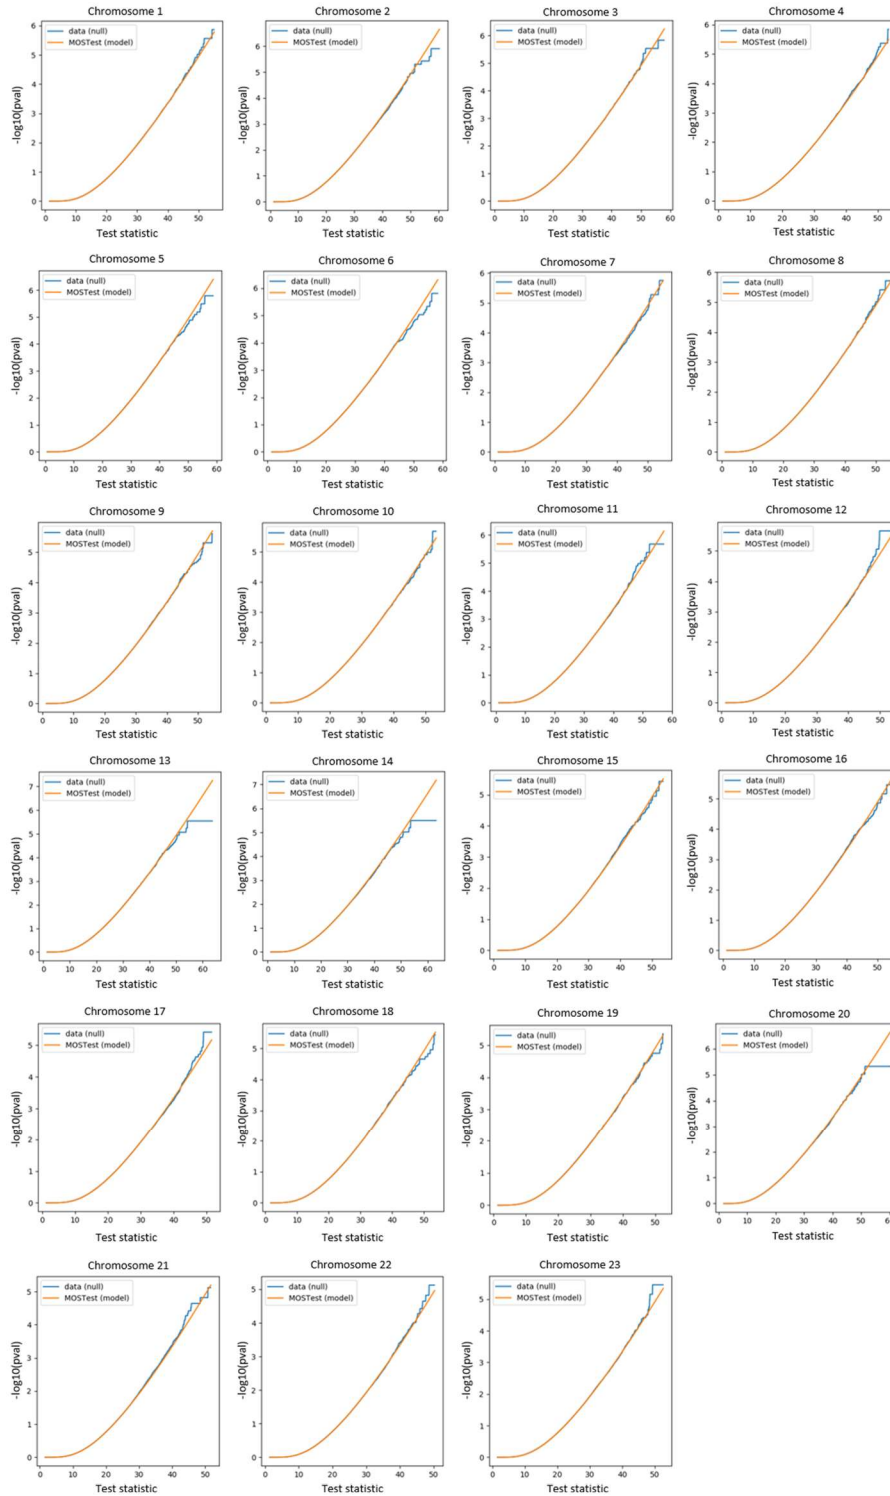

**Supplementary Figure 6. Permuted and analytic P value distributions under the null, for the multivariate GWAS of node-level connectivity.** Only null distributions are shown here, i.e. not the true association results. Close matching of the null p-value distributions from the permuted data (blue) and analytic forms (orange) indicate correct control of type 1 error. The analytic distribution can then be extrapolated to assess the significance of multivariate associations with far lower p values (see Methods). ‘Chromosome 23’ refers to chromosome X.

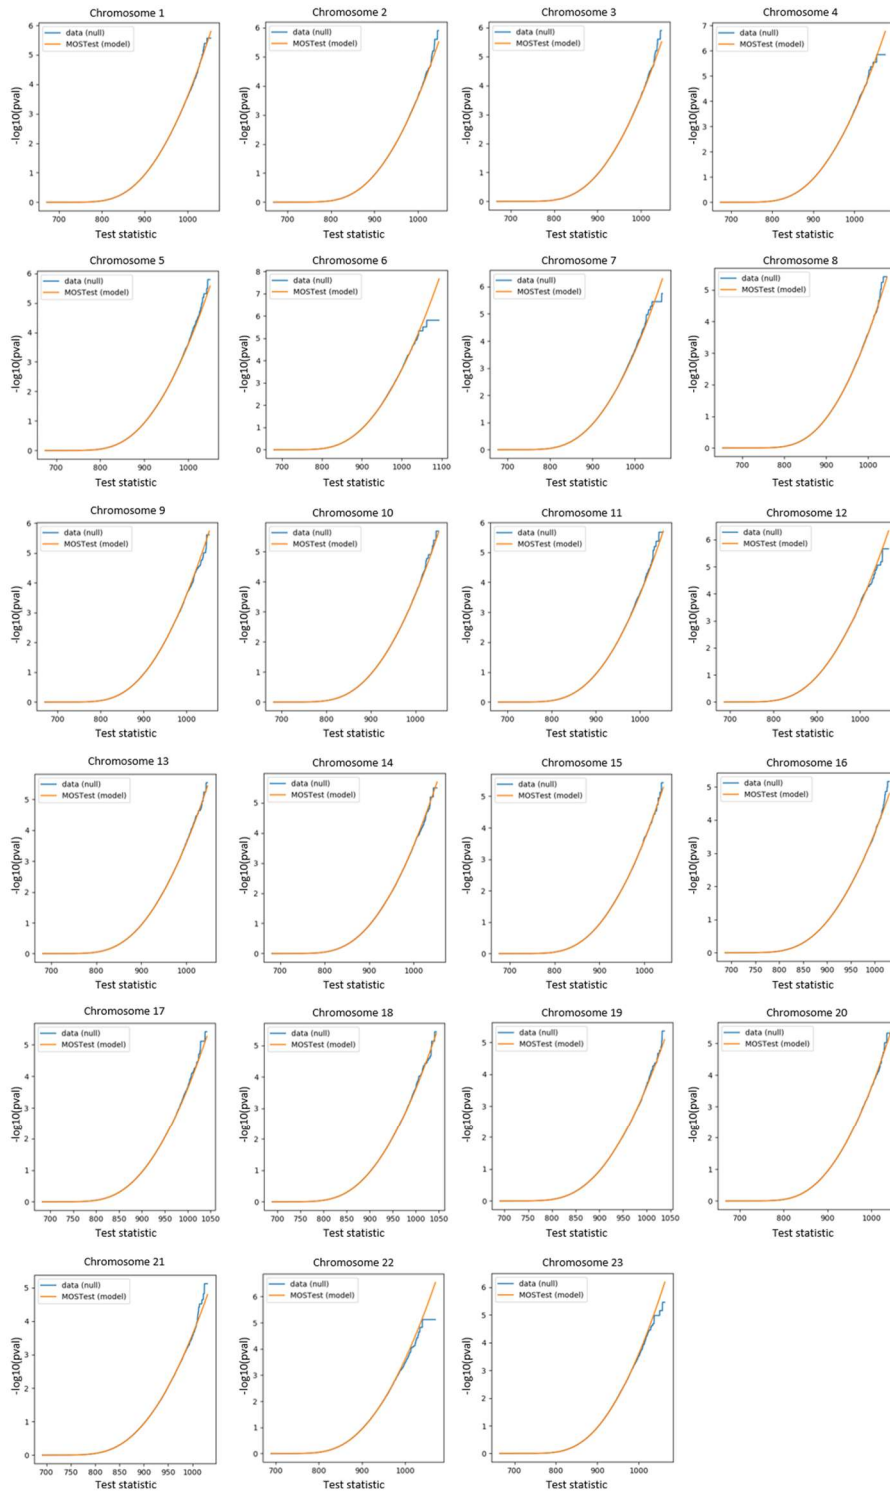

**Supplementary Figure 7. Permuted and analytic P value distributions under the null, for the multivariate GWAS of edge-level connectivity.** Only null distributions are shown here, i.e. not the true association results. Close matching of the null p-value distributions from the permuted data (blue) and analytic forms (orange) indicate correct control of type 1 error. The analytic distribution can then be extrapolated to assess the significance of multivariate associations with far lower p values (see Methods). ‘Chromosome 23’ refers to chromosome X.



Regional contributions to the significant multivariate associations in mvGWAS

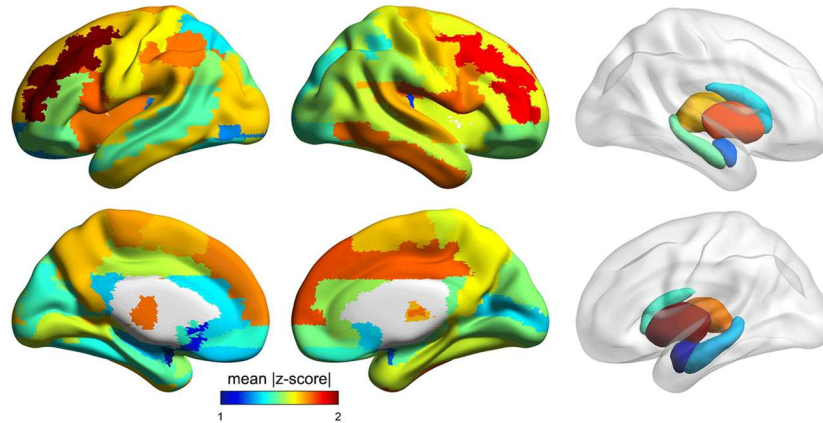

**Supplementary Figure 8. Regional contributions to the significant multivariate associations in the node-level connectivity mvGWAS.** For each region we calculated its average multivariate association z-score across all independently associated lead SNPs in the genome. This gives an indication of which node-level connectivities tend to be more often associated with genomic loci in general.



Gene annotation based on the multivariate GWAS of node-level connectivity

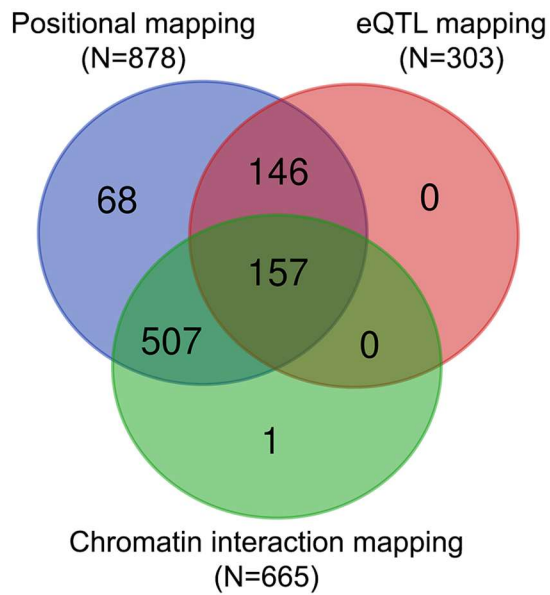

Gene annotation based on the multivariate GWAS of edge-level connectivity

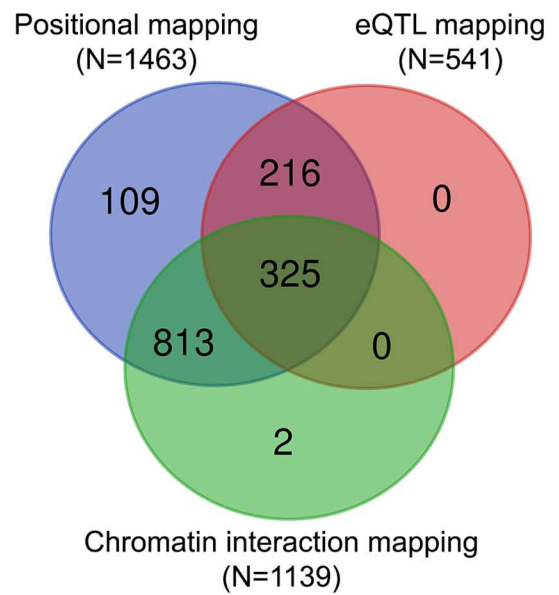

**Supplementary Figure 10. Numbers of annotated genes at significantly associated genomic loci using three mapping strategies in FUMA.** Left panel: annotated genes for significantly associated genomic loci in the multivariate GWAS of node-level connectivity. Right panel: annotated genes for significantly associated genomic loci in the multivariate GWAS of edge-level connectivity.

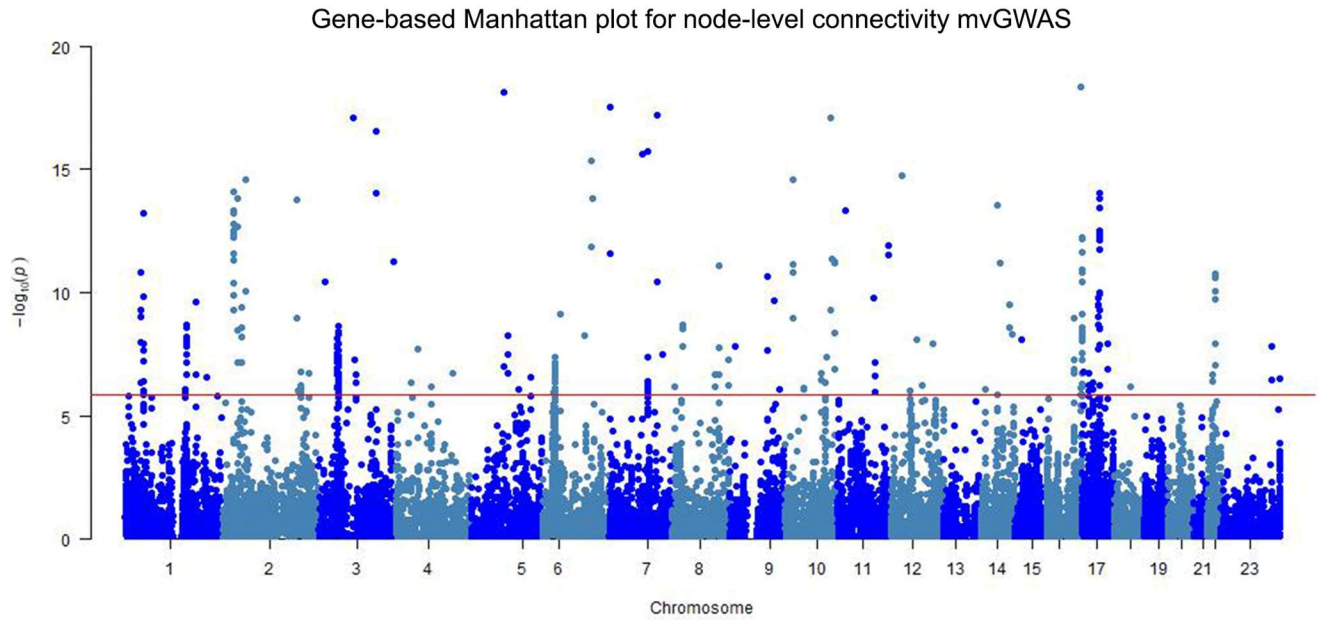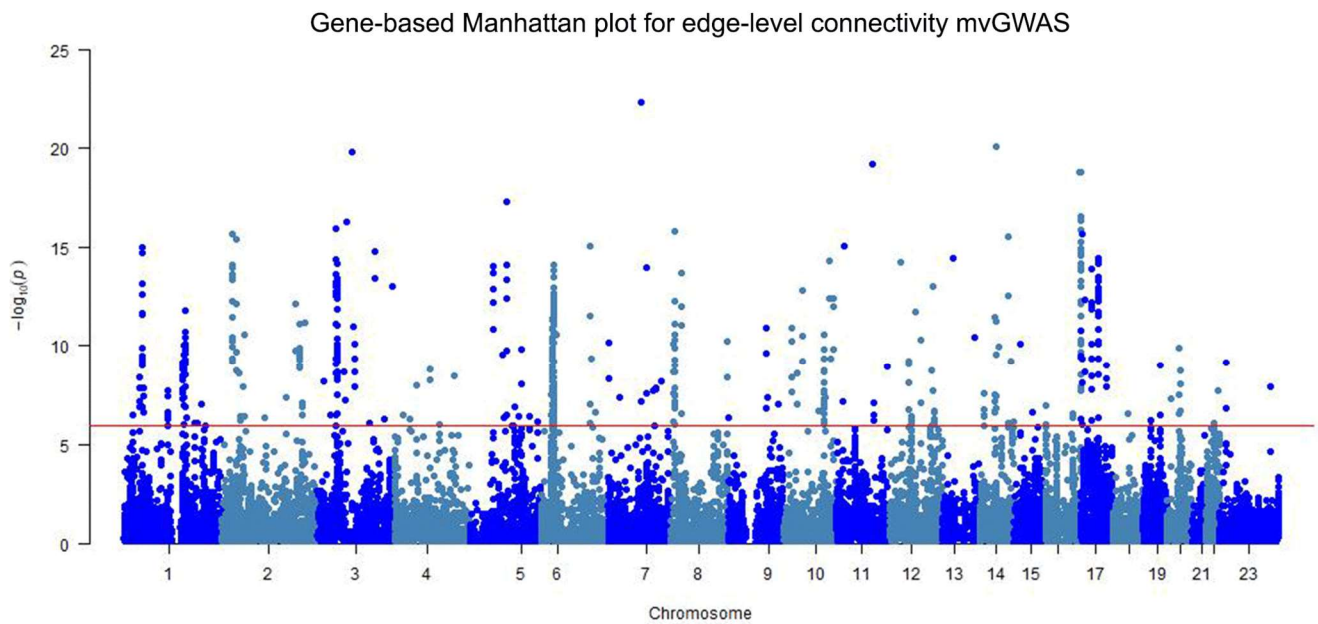

**Supplementary Figure 11. Manhattan plots for genome-wide gene-based association analysis, separately using the node-level connectivity mvGWAS (upper) and edge-level connectivity mvGWAS (lower) results as input.** The red line indicates the Bonferroni-corrected significance threshold for gene-based analysis of 20,146 genes ( $p < 0.025/20,146$ ).



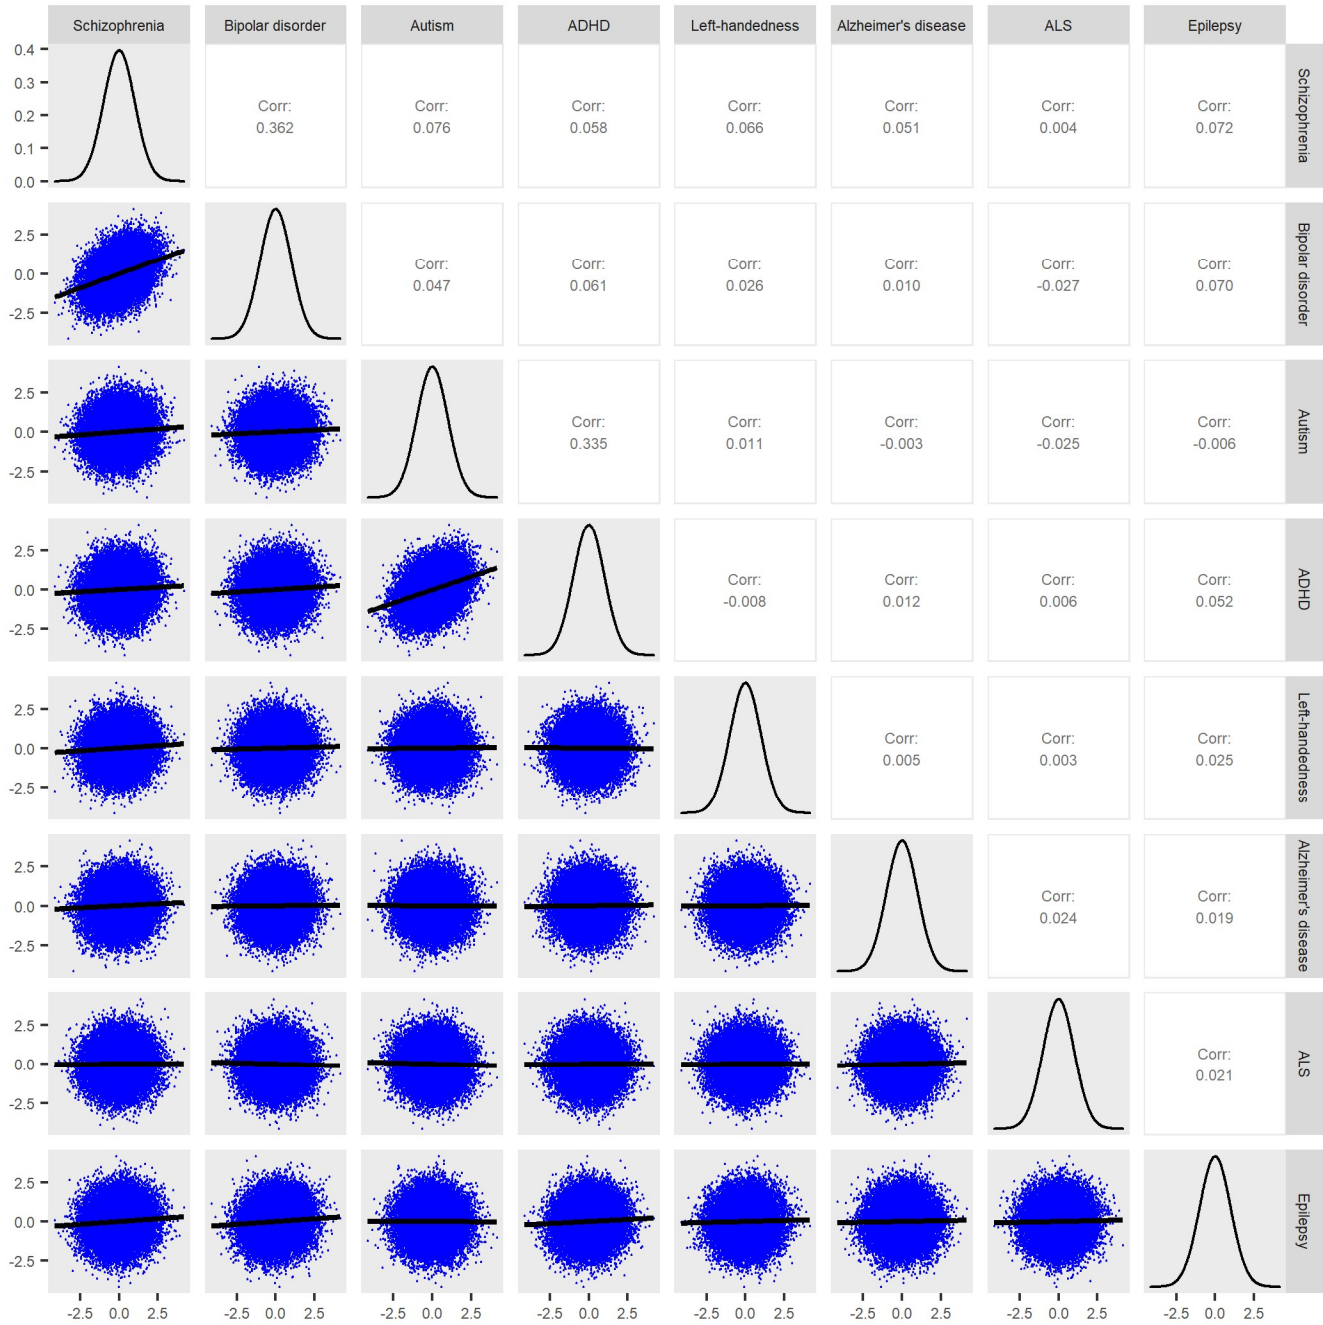

**Supplementary Figure 12. Partial correlations between normalized polygenic scores for brain-related disorders or behavioral traits.** Confounds including sex and age have been removed – see Methods. The diagonal of the matrix shows the distributions of the polygenic scores across the 30,810 individuals.

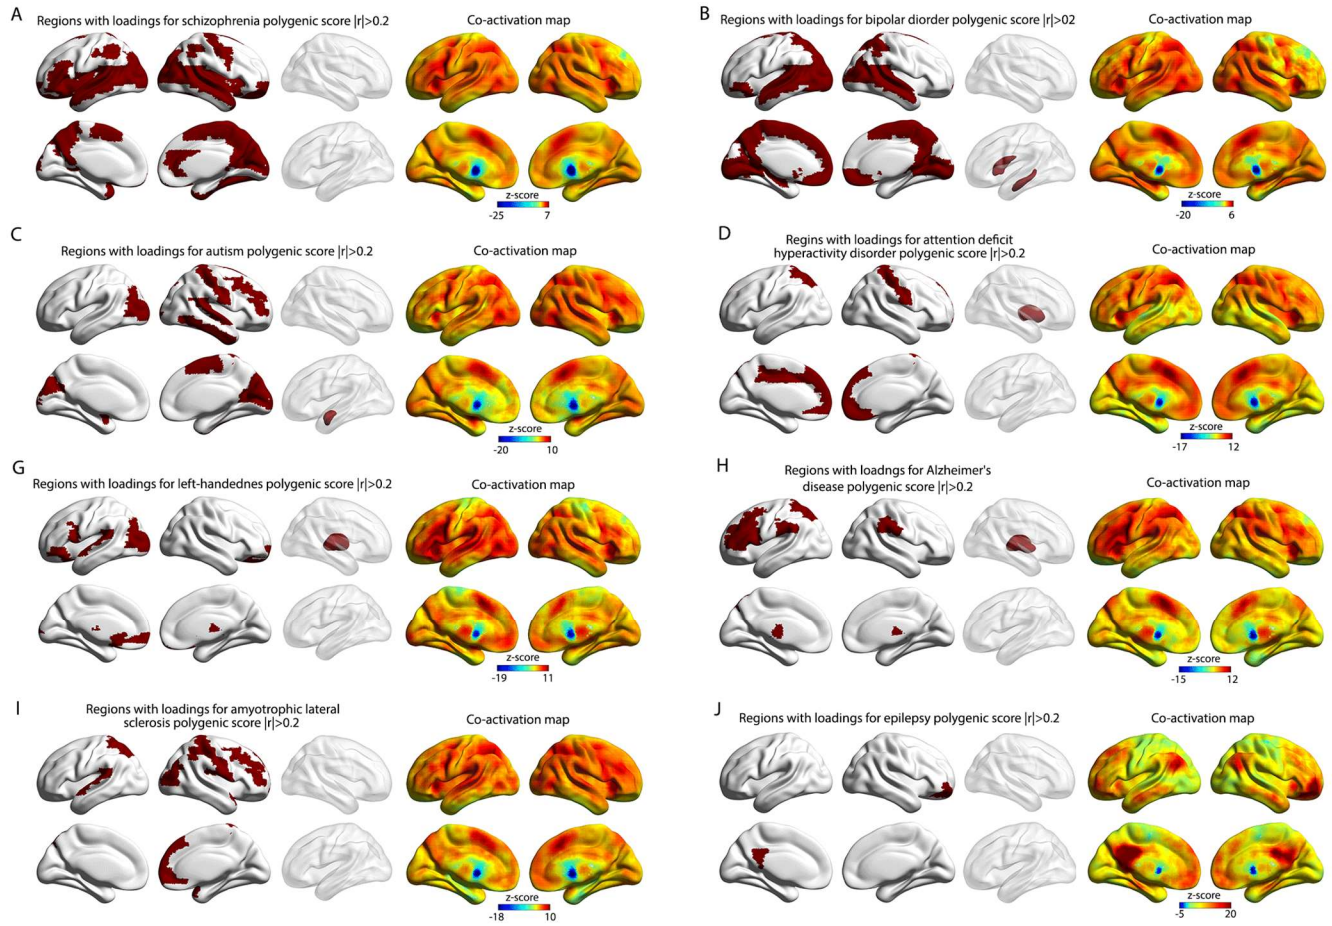

**Supplementary Figure 13. Node-level connectivities showing the strongest associations with polygenic scores for brain-related disorders or behavioral traits.** Left panel: Regions with loadings  $|r|>0.2$  in canonical correlation analysis of their connectivities with a given polygenic score. The regional maps were used to define binary masks to query the Neurosynth database of meta-analyzed functional neuroimaging data from thousands of published studies. Right panel: Brain co-activation maps derived from the "decoder" function of Neurosynth, corresponding to the input masks.

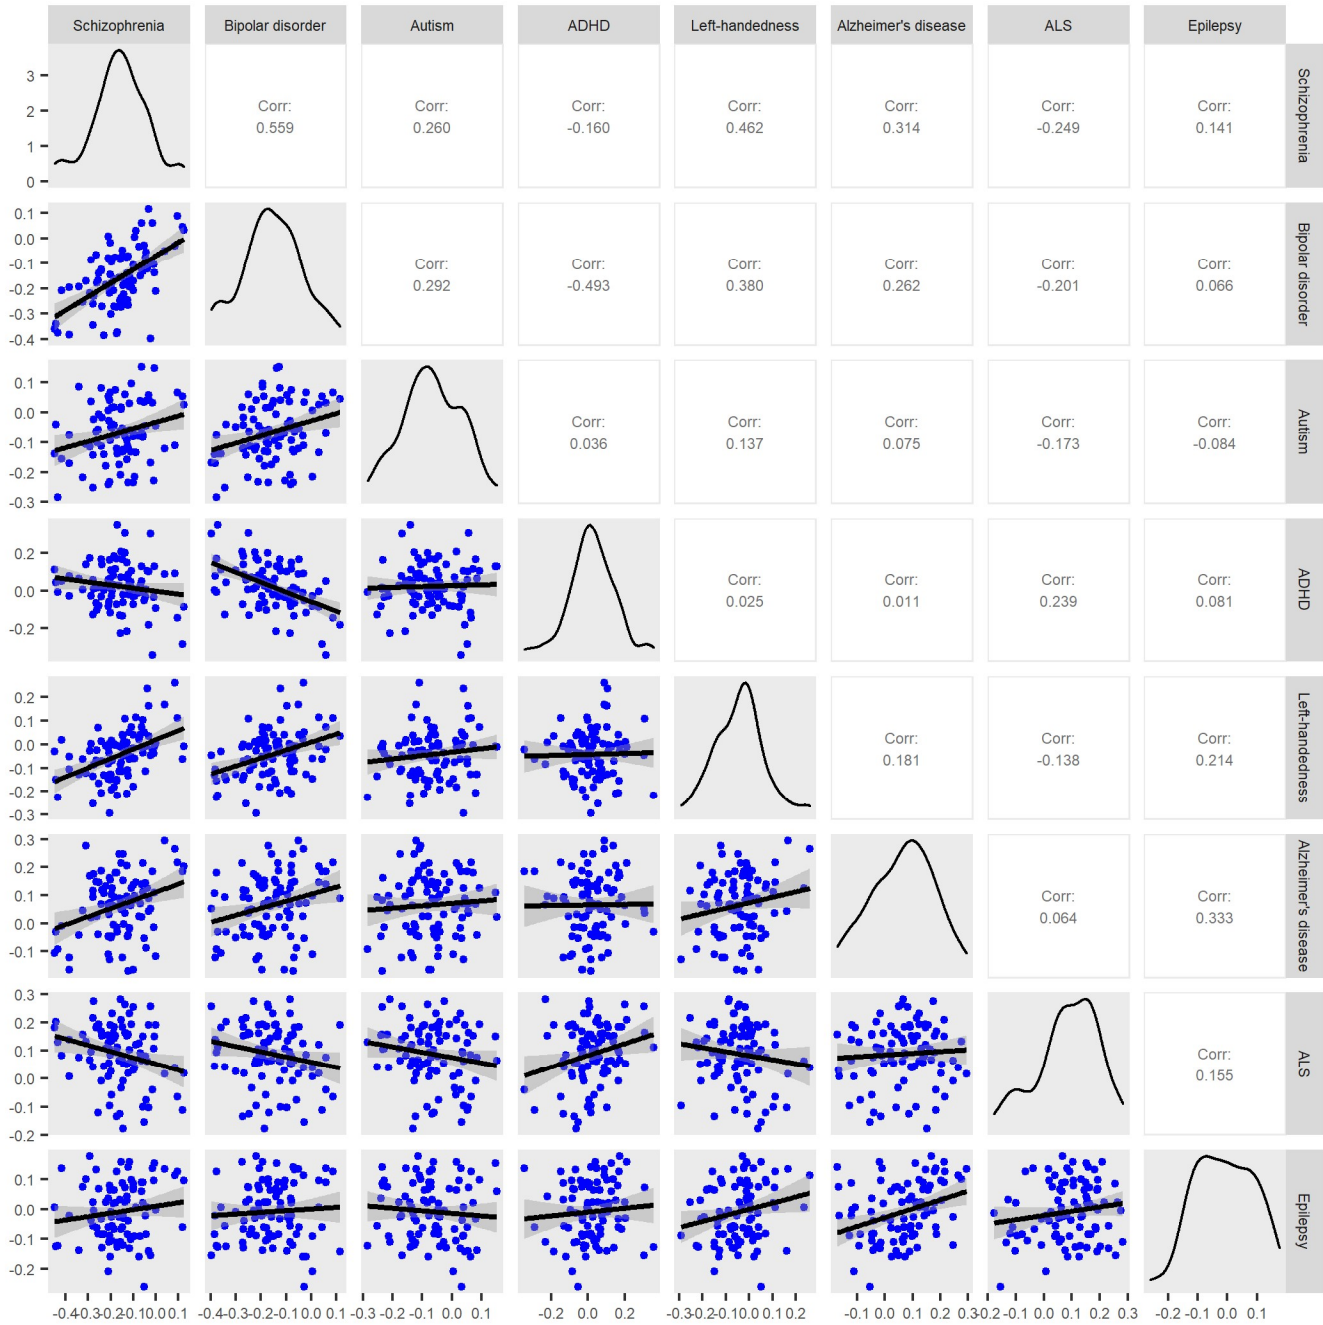

**Supplementary Figure 14. Correlations between the loadings derived from different canonical correlation analyses between polygenic scores and node-level connectivities.** These correlations are calculated over 90 brain regions. They show the extents to which polygenic dispositions to two different disorders/behaviors tend to associate consistently with the same brain regions. The diagonal of the matrix shows the distributions of loadings across regions.

**Supplementary Tables 1-31. All supplementary tables are given in one separate Excel file. Their contents are as follows:**

**Supplementary Table 1.** Node-level connectivity of the structural connectome.

**Supplementary Table 2.** SNP-based heritability estimates for node-level connectivity.

**Supplementary Table 3.** SNP-based heritability estimates for edge-level connectivity.

**Supplementary Table 4.** Significance of SNP-based heritability estimates for edge-level connectivities.

**Supplementary Table 5.** Standard errors of SNP-based heritability estimates for edge-level heritabilities.

**Supplementary Table 6.** 95% confidence intervals of SNP-based heritability estimates for edge-level heritabilities.

**Supplementary Table 7.** Intraclass correlation coefficients from reliability analysis for node-level connectivity.

**Supplementary Table 8.** Intraclass correlation coefficients from reliability analysis for edge-level connectivity.

**Supplementary Table 9.** Lead SNPs from multivariate GWAS of node-level connectivity.

**Supplementary Table 10.** Lead SNPs from multivariate GWAS of edge-level connectivity.

**Supplementary Table 11.** Univariate association z scores for each lead SNP and node-level connectivities.

**Supplementary Table 12.** Univariate association z scores for each lead SNP and edge-level connectivities.

**Supplementary Table 13.** Regional contributions to the significant multivariate associations from node-level connectivity mvGWAS.

**Supplementary Table 14.** The contributions of individual edges to the significant multivariate associations from edge-level connectivity mvGWAS.

**Supplementary Table 15.** Lead SNPs associated with either node-level connectivity or edge-level connectivity in the present study that were also associated with white matter microstructure in reference 10 (see main text).

**Supplementary Table 16.** Gene mapping at all significant node-level connectivity mvGWAS loci based on three strategies.

**Supplementary Table 17.** Gene mapping at all significant edge-level connectivity mvGWAS loci based on three strategies.

**Supplementary Table 18.** Significant genes from gene-based analysis of node-level connectivity mvGWAS results.

**Supplementary Table 19.** Results from MAGMA gene set analysis, using node-level connectivity multivariate GWAS as input.

**Supplementary Table 20.** Significant genes from gene-based analysis of edge-level connectivity multivariate GWAS results.

**Supplementary Table 21.** Results from MAGMA gene set analysis, using edge-level connectivity multivariate GWAS as input.

**Supplementary Table 22.** Differential expression of genes associated with node-level connectivity in different lifespan stages from BrainSpan brain samples.

**Supplementary Table 23.** Differential expression of genes associated with edge-level connectivity in different lifespan stages from BrainSpan brain samples.

**Supplementary Table 24.** Differential expression of genes associated with node-level connectivity in different cell types in the developing human brain.

**Supplementary Table 25.** Differential expression of genes associated with edge-level connectivity in different cell types in the developing human brain.

**Supplementary Table 26.** Lead SNPs showing significant association with at least one core language network tract connectivity, and genes annotated to these lead SNPs by genomic position, eQTL and chromatin interaction.

**Supplementary Table 27.** Correlations between polygenic scores for brain-related disorder or behavioural traits.

**Supplementary Table 28.** Loadings from the canonical correlation analyses between node-level connectivities and polygenic dispositions to brain-related disorders or behavioural traits.

**Supplementary Table 29.** Loadings from the canonical correlation analyses between node-level connectivities and polygenic dispositions for Alzheimer's disease after excluding the APOE locus.

**Supplementary Table 30.** Functional terms based on meta-analyzed fMRI data, associated with co-activation maps for brain regions where node-level connectivity had loadings  $|r|>0.2$  for polygenic scores of brain-related disorders or behavioural traits.

**Supplementary Table 31.** Correlation coefficients (across 90 regions) between loadings from multivariate associations of node-level connectivities with polygenic dispositions to brain-related disorders or behavioural traits.
